# Supplementary material for: Location of metallic elements in (Co1−xFex)2(OH)2(C8H4O4): use of MAD, neutron diffraction and 57Fe Mössbauer spectroscopy
Source: Royal Society of Chemistry journal article supplement (doi:10.1039/b926144c), 2010-01-01
Supplement: b926144c.pdf [file b926144c.pdf]

## SUPPLEMENTARY INFORMATIONS

### Resonant X-ray diffraction for hybrid compounds: a promising tool for solid solution approaches of polymetallic systems

Adel Mesbah, Bernard Malaman, Thomas Mazet, Romain Sibille and Michel François

**Table S1:** Analysis of the metallic compositions for 1, 2, 3 and 4 by Electron Probe Micro Analysis

| Sample | Formula                                                                             | Calculated<br>(at. % of Co) | Found<br>(at. % of Co) |
|--------|-------------------------------------------------------------------------------------|-----------------------------|------------------------|
| 1      | $(\text{Co}_{0.75}\text{Fe}_{0.25})_2(\text{OH})_2(\text{C}_8\text{H}_4\text{O}_4)$ | 88                          | 88.3                   |
| 2      | $(\text{Co}_{0.5}\text{Fe}_{0.5})_2(\text{OH})_2(\text{C}_8\text{H}_4\text{O}_4)$   | 75                          | 71.75                  |
| 3      | $(\text{Co}_{0.25}\text{Fe}_{0.75})_2(\text{OH})_2(\text{C}_8\text{H}_4\text{O}_4)$ | 50                          | 47                     |
| 4      | $(\text{Co}_{0.12}\text{Fe}_{0.88})_2(\text{OH})_2(\text{C}_8\text{H}_4\text{O}_4)$ | 25                          | 24.92                  |

**Table S2:** refined atomic coordinates from synchrotron and neutron data**i) Refined atomic coordinates from synchrotron data****Sample 1** (Fe<sub>0.25</sub>Co<sub>0.75</sub>)<sub>2</sub>(OH)<sub>2</sub>tp T = 100K

| Name  | x (sx)       | y (sy)        | z (sz)        | B (sB)     | Occ. (sOcc) | Mult. |
|-------|--------------|---------------|---------------|------------|-------------|-------|
| M1-Fe | 0.00000( 0)  | 0.00000( 0)   | 0.00000( 0)   | 0.168( 16) | 0.288( 35)  | 2     |
| M1-Co | 0.00000( 0)  | 0.00000( 0)   | 0.00000( 0)   | 0.168( 16) | 1.712( 35)  | 2     |
| M2-Fe | 0.00000( 0)  | 0.50000( 0)   | 0.50000( 0)   | 1.028( 67) | 0.712( 35)  | 2     |
| M2-Co | 0.00000( 0)  | 0.50000( 0)   | 0.50000( 0)   | 1.028( 67) | 1.288( 35)  | 2     |
| O1    | 0.07031( 21) | 0.00000( 0)   | 0.46927( 67)  | 0.519( 69) | 4.000( 0)   | 4     |
| O2    | 0.10265( 22) | 0.00000( 0)   | 0.12796( 53)  | 0.519( 69) | 4.000( 0)   | 4     |
| OH    | 0.03051( 24) | 0.50000( 0)   | 0.81876( 81)  | 0.712( 0)  | 4.000( 0)   | 4     |
| C1    | 0.11281( 23) | 0.00000( 0)   | 0.33183( 59)  | 0.519( 69) | 4.000( 0)   | 4     |
| C2    | 0.18513( 33) | 0.13892( 280) | 0.41897( 101) | 0.519( 69) | 4.000( 0)   | 8     |
| C3    | 0.26770( 24) | 0.23233( 257) | 0.72024( 119) | 0.519( 69) | 4.000( 0)   | 8     |
| C4    | 0.20107( 25) | 0.13343( 294) | 0.64130( 104) | 0.519( 69) | 4.000( 0)   | 8     |

**Sample 2** (Fe<sub>0.5</sub>Co<sub>0.5</sub>)<sub>2</sub>(OH)<sub>2</sub>tp T = 100K

| Name  | x (sx)       | y (sy)        | z (sz)        | B (sB)     | Occ. (sOcc) | Mult. |
|-------|--------------|---------------|---------------|------------|-------------|-------|
| M1-Fe | 0.00000( 0)  | 0.00000( 0)   | 0.00000( 0)   | 0.360( 25) | 0.643( 44)  | 2     |
| M1-Co | 0.00000( 0)  | 0.00000( 0)   | 0.00000( 0)   | 0.360( 25) | 1.357( 44)  | 2     |
| M2-Fe | 0.00000( 0)  | 0.50000( 0)   | 0.50000( 0)   | 0.225( 70) | 1.357( 44)  | 2     |
| M2-Co | 0.00000( 0)  | 0.50000( 0)   | 0.50000( 0)   | 0.225( 70) | 0.643( 44)  | 2     |
| O1    | 0.07121( 24) | 0.00000( 0)   | 0.46634( 79)  | 0.201( 69) | 4.000( 0)   | 4     |
| O2    | 0.10219( 26) | 0.00000( 0)   | 0.13035( 58)  | 0.201( 69) | 4.000( 0)   | 4     |
| OH    | 0.02965( 27) | 0.50000( 0)   | 0.82018( 90)  | 0.051( 0)  | 4.000( 0)   | 4     |
| C1    | 0.11473( 24) | 0.00000( 0)   | 0.33314( 61)  | 0.201( 69) | 4.000( 0)   | 4     |
| C2    | 0.18717( 36) | 0.13034( 317) | 0.42286( 104) | 0.201( 69) | 4.000( 0)   | 8     |
| C3    | 0.26656( 26) | 0.24399( 303) | 0.72421( 126) | 0.201( 69) | 4.000( 0)   | 8     |
| C4    | 0.20039( 28) | 0.14574( 328) | 0.64430( 116) | 0.201( 69) | 4.000( 0)   | 8     |

**Sample 3** (Fe<sub>0.75</sub>Co<sub>0.25</sub>)<sub>2</sub>(OH)<sub>2</sub>tp T = 100K

| Name  | x (sx)       | y (sy)        | z (sz)        | B (sB)     | Occ. (sOcc) | Mult. |
|-------|--------------|---------------|---------------|------------|-------------|-------|
| M1-Fe | 0.00000( 0)  | 0.00000( 0)   | 0.00000( 0)   | 0.305( 17) | 1.091( 37)  | 2     |
| M1-Co | 0.00000( 0)  | 0.00000( 0)   | 0.00000( 0)   | 0.305( 17) | 0.909( 37)  | 2     |
| M2-Fe | 0.00000( 0)  | 0.50000( 0)   | 0.50000( 0)   | 0.622( 57) | 1.909( 37)  | 2     |
| M2-Co | 0.00000( 0)  | 0.50000( 0)   | 0.50000( 0)   | 0.622( 57) | 0.091( 37)  | 2     |
| O1    | 0.07018( 19) | 0.00000( 0)   | 0.46684( 60)  | 0.488( 54) | 4.000( 0)   | 4     |
| O2    | 0.10361( 20) | 0.00000( 0)   | 0.13079( 50)  | 0.488( 54) | 4.000( 0)   | 4     |
| OH    | 0.02996( 20) | 0.50000( 0)   | 0.81673( 67)  | 0.423( 0)  | 4.000( 0)   | 4     |
| C1    | 0.11414( 21) | 0.00000( 0)   | 0.33318( 57)  | 0.488( 54) | 4.000( 0)   | 4     |
| C2    | 0.18676( 30) | 0.13679( 223) | 0.41675( 93)  | 0.488( 54) | 4.000( 0)   | 8     |
| C3    | 0.26702( 23) | 0.24663( 222) | 0.72774( 111) | 0.488( 54) | 4.000( 0)   | 8     |
| C4    | 0.20121( 25) | 0.14398( 222) | 0.64135( 101) | 0.488( 54) | 4.000( 0)   | 8     |

**Sample 4** (Fe<sub>0.88</sub>Co<sub>0.12</sub>)<sub>2</sub>(OH)<sub>2</sub>tp T = 100K

| Name  | x (sx)       | y (sy)        | z (sz)        | B (sB)     | Occ. (sOcc) | Mult. |
|-------|--------------|---------------|---------------|------------|-------------|-------|
| M1-Fe | 0.00000( 0)  | 0.00000( 0)   | 0.00000( 0)   | 0.295( 20) | 1.658( 44)  | 2     |
| M1-Co | 0.00000( 0)  | 0.00000( 0)   | 0.00000( 0)   | 0.295( 20) | 0.342( 44)  | 2     |
| M2-Fe | 0.00000( 0)  | 0.50000( 0)   | 0.50000( 0)   | 0.400( 61) | 1.862( 44)  | 2     |
| M2-Co | 0.00000( 0)  | 0.50000( 0)   | 0.50000( 0)   | 0.400( 61) | 0.138( 44)  | 2     |
| O1    | 0.07091( 19) | 0.00000( 0)   | 0.46783( 61)  | 0.525( 46) | 4.000( 0)   | 4     |
| O2    | 0.10358( 20) | 0.00000( 0)   | 0.13226( 51)  | 0.525( 46) | 4.000( 0)   | 4     |
| OH    | 0.03149( 21) | 0.50000( 0)   | 0.82086( 71)  | 0.525( 46) | 4.000( 0)   | 4     |
| C1    | 0.11521( 21) | 0.00000( 0)   | 0.33460( 57)  | 0.525( 46) | 4.000( 0)   | 4     |
| C2    | 0.18748( 31) | 0.13416( 228) | 0.41973( 95)  | 0.525( 46) | 4.000( 0)   | 8     |
| C3    | 0.26405( 23) | 0.25361( 227) | 0.72026( 116) | 0.525( 46) | 4.000( 0)   | 8     |
| C4    | 0.19845( 25) | 0.14086( 225) | 0.64304( 103) | 0.525( 46) | 4.000( 0)   | 8     |

### i) Refined atomic coordinates from neutron data

#### Sample 1 (Fe<sub>0.25</sub>Co<sub>0.75</sub>)<sub>2</sub>(OH)<sub>2</sub>tp T = 2K

| Name | x (sx)      | y (sy)       | z (sz)      | B (sB)    | Occ. (sOcc) | Mult. |
|------|-------------|--------------|-------------|-----------|-------------|-------|
| Fe1  | 0.00000( 0) | 0.00000( 0)  | 0.00000( 0) | 0.000( 0) | 0.128( 70)  | 2     |
| Co1  | 0.00000( 0) | 0.00000( 0)  | 0.00000( 0) | 0.000( 0) | 1.872( 70)  | 2     |
| Fe2  | 0.00000( 0) | 0.50000( 0)  | 0.50000( 0) | 0.000( 0) | 0.832( 60)  | 2     |
| Co2  | 0.00000( 0) | 0.50000( 0)  | 0.50000( 0) | 0.000( 0) | 1.168( 60)  | 2     |
| C1   | 0.11602( 0) | 0.09048( 0)  | 0.33526( 0) | 0.000( 0) | 0.500( 0)   | 8     |
| C2   | 0.18919( 0) | 0.17210( 0)  | 0.42750( 0) | 0.000( 0) | 0.500( 0)   | 8     |
| C3   | 0.26935( 0) | 0.27927( 0)  | 0.74007( 0) | 0.000( 0) | 0.500( 0)   | 8     |
| C4   | 0.20488( 0) | 0.15466( 0)  | 0.65135( 0) | 0.000( 0) | 0.500( 0)   | 8     |
| O1   | 0.07185( 0) | 0.00000( 0)  | 0.46211( 0) | 0.000( 0) | 0.500( 0)   | 4     |
| O2   | 0.10215( 0) | 0.00000( 0)  | 0.13772( 0) | 0.000( 0) | 0.500( 0)   | 4     |
| OH   | 0.03172( 0) | -0.50000( 0) | 0.83383( 0) | 0.000( 0) | 0.500( 0)   | 4     |
| H1   | 0.08040( 0) | 0.50000( 0)  | 0.86346( 0) | 0.000( 0) | 0.500( 0)   | 4     |
| H2   | 0.28590( 0) | 0.74228( 0)  | 0.89181( 0) | 0.000( 0) | 0.500( 0)   | 8     |
| H3   | 0.17038( 0) | 0.13142( 0)  | 0.75210( 0) | 0.000( 0) | 0.500( 0)   | 8     |

#### Sample 2 (Fe<sub>0.5</sub>Co<sub>0.5</sub>)<sub>2</sub>(OH)<sub>2</sub>tp T = 100K

| Name | x (sx)        | y (sy)        | z (sz)        | B (sB)    | Occ. (sOcc) | Mult. |
|------|---------------|---------------|---------------|-----------|-------------|-------|
| Fe1  | 0.00000( 0)   | 0.00000( 0)   | 0.00000( 0)   | 0.000( 0) | 0.560( 64)  | 2     |
| Co1  | 0.00000( 0)   | 0.00000( 0)   | 0.00000( 0)   | 0.000( 0) | 1.440( 64)  | 2     |
| Fe2  | 0.00000( 0)   | 0.50000( 0)   | 0.50000( 0)   | 0.000( 0) | 1.440( 56)  | 2     |
| Co2  | 0.00000( 0)   | 0.50000( 0)   | 0.50000( 0)   | 0.000( 0) | 0.560( 56)  | 2     |
| C1   | 0.11745( 66)  | 0.03482(1539) | 0.33890( 110) | 0.000( 0) | 0.500( 0)   | 8     |
| C2   | 0.18918( 39)  | 0.17224( 742) | 0.42765( 61)  | 0.000( 0) | 0.500( 0)   | 8     |
| C3   | 0.26932( 49)  | 0.27952( 968) | 0.73987( 83)  | 0.000( 0) | 0.500( 0)   | 8     |
| C4   | 0.20482( 48)  | 0.15472( 843) | 0.65153( 77)  | 0.000( 0) | 0.500( 0)   | 8     |
| O1   | 0.06896( 106) | 0.00000( 0)   | 0.45876( 408) | 0.000( 0) | 0.500( 0)   | 4     |
| O2   | 0.10607( 145) | 0.00000( 0)   | 0.13471( 89)  | 0.000( 0) | 0.500( 0)   | 4     |
| OH   | 0.03017( 48)  | -0.50000( 0)  | 0.81304( 731) | 0.000( 0) | 0.500( 0)   | 4     |
| H1   | 0.08000( 49)  | 0.50000( 0)   | 0.82453( 849) | 0.000( 0) | 0.500( 0)   | 4     |
| H2   | 0.28589( 293) | 0.74329(1703) | 0.89240( 292) | 0.000( 0) | 0.500( 0)   | 8     |
| H3   | 0.16767( 176) | 0.11657(1946) | 0.74435( 626) | 0.000( 0) | 0.500( 0)   | 8     |

#### Sample 4 (Fe<sub>0.88</sub>Co<sub>0.12</sub>)<sub>2</sub>(OH)<sub>2</sub>tp T = 75K

| Name | x (sx)        | y (sy)        | z (sz)        | B (sB)    | Occ. (sOcc) | Mult. |
|------|---------------|---------------|---------------|-----------|-------------|-------|
| Fe1  | 0.00000( 0)   | 0.00000( 0)   | 0.00000( 0)   | 0.000( 0) | 1.576( 6)   | 2     |
| Co1  | 0.00000( 0)   | 0.00000( 0)   | 0.00000( 0)   | 0.000( 0) | 0.424( 6)   | 2     |
| Fe2  | 0.00000( 0)   | 0.50000( 0)   | 0.50000( 0)   | 0.000( 0) | 2.000( 0)   | 2     |
| Co2  | 0.00000( 0)   | 0.50000( 0)   | 0.50000( 0)   | 0.000( 0) | 0.000( 0)   | 2     |
| C1   | 0.11838( 51)  | 0.02979(1133) | 0.33895( 87)  | 0.000( 0) | 0.500( 0)   | 8     |
| C2   | 0.18881( 28)  | 0.17580( 459) | 0.42964( 61)  | 0.000( 0) | 0.500( 0)   | 8     |
| C3   | 0.26805( 39)  | 0.30005( 622) | 0.73476( 88)  | 0.000( 0) | 0.500( 0)   | 8     |
| C4   | 0.20567( 36)  | 0.14370( 485) | 0.65062( 75)  | 0.000( 0) | 0.500( 0)   | 8     |
| O1   | 0.07086( 81)  | 0.00000( 0)   | 0.46254( 306) | 0.000( 0) | 0.500( 0)   | 4     |
| O2   | 0.10329( 98)  | 0.00000( 0)   | 0.13743( 94)  | 0.000( 0) | 0.500( 0)   | 4     |
| OH   | 0.03182( 46)  | -0.50000( 0)  | 0.79842( 413) | 0.000( 0) | 0.500( 0)   | 4     |
| H1   | 0.08087( 48)  | 0.50000( 0)   | 0.80336( 673) | 0.000( 0) | 0.500( 0)   | 4     |
| H2   | 0.28009( 193) | 0.71751(1104) | 0.88859( 195) | 0.000( 0) | 0.500( 0)   | 8     |
| H3   | 0.16733( 109) | 0.14214(1164) | 0.73943( 461) | 0.000( 0) | 0.500( 0)   | 8     |

**Table S3:** M1-O and M2-O distances in the solid solution (Co<sub>2-x</sub>Fe<sub>x</sub>)(OH)<sub>2</sub>tp  
(1) x = 0.25, (2) x = 0.5, (3) x = 0.75, (4) x = 0.88

**Sample 1:** x = 0.25

|                |   |   |                     |             |          |          |          |
|----------------|---|---|---------------------|-------------|----------|----------|----------|
| 1              | 6 | 1 | (M1)-(O2): 2.129(4) | (0, 0, 0)   | 0.10290  | 0.00000  | 0.12860  |
| 1              | 6 | 2 | (M1)-(O2): 2.129(4) | (0, 0, 0)   | -0.10290 | 0.00000  | -0.12860 |
| 1              | 7 | 1 | (M1)-(OH): 2.125(3) | (0, -1, -1) | 0.03090  | -0.50000 | -0.18090 |
| 1              | 7 | 1 | (M1)-(OH): 2.125(3) | (0, 0, -1)  | 0.03090  | 0.50000  | -0.18090 |
| 1              | 7 | 2 | (M1)-(OH): 2.125(3) | (0, -1, 1)  | -0.03090 | -0.50000 | 0.18090  |
| 1              | 7 | 2 | (M1)-(OH): 2.125(3) | (0, 0, 1)   | -0.03090 | 0.50000  | 0.18090  |
| <b>average</b> |   |   | <b>2.127</b>        |             |          |          |          |

|                |   |   |                     |           |          |         |         |
|----------------|---|---|---------------------|-----------|----------|---------|---------|
| 3              | 5 | 1 | (M2)-(O1): 2.180(3) | (0, 0, 0) | 0.07020  | 0.00000 | 0.46870 |
| 3              | 5 | 1 | (M2)-(O1): 2.180(3) | (0, 1, 0) | 0.07020  | 1.00000 | 0.46870 |
| 3              | 5 | 2 | (M2)-(O1): 2.180(3) | (0, 0, 1) | -0.07020 | 0.00000 | 0.53130 |
| 3              | 5 | 2 | (M2)-(O1): 2.180(3) | (0, 1, 1) | -0.07020 | 1.00000 | 0.53130 |
| 3              | 7 | 1 | (M2)-(OH): 2.042(5) | (0, 0, 0) | 0.03090  | 0.50000 | 0.81910 |
| 3              | 7 | 2 | (M2)-(OH): 2.042(5) | (0, 0, 1) | -0.03090 | 0.50000 | 0.18090 |
| <b>average</b> |   |   | <b>2.1340</b>       |           |          |         |         |

**Sample 2:** x = 0.5

|                |   |   |                     |             |          |          |          |
|----------------|---|---|---------------------|-------------|----------|----------|----------|
| 1              | 6 | 1 | (M1)-(O2): 2.125(6) | (0, 0, 0)   | 0.10240  | 0.00000  | 0.13090  |
| 1              | 6 | 2 | (M1)-(O2): 2.125(6) | (0, 0, 0)   | -0.10240 | 0.00000  | -0.13090 |
| 1              | 7 | 1 | (M1)-(OH): 2.123(4) | (0, -1, -1) | 0.03000  | -0.50000 | -0.17990 |
| 1              | 7 | 1 | (M1)-(OH): 2.123(4) | (0, 0, -1)  | 0.03000  | 0.50000  | -0.17990 |
| 1              | 7 | 2 | (M1)-(OH): 2.123(4) | (0, -1, 1)  | -0.03000 | -0.50000 | 0.17990  |
| 1              | 7 | 2 | (M1)-(OH): 2.123(4) | (0, 0, 1)   | -0.03000 | 0.50000  | 0.17990  |
| <b>average</b> |   |   | <b>2.1237</b>       |             |          |          |          |

|                |   |   |                     |           |          |         |         |
|----------------|---|---|---------------------|-----------|----------|---------|---------|
| 3              | 5 | 1 | (M2)-(O1): 2.205(3) | (0, 0, 0) | 0.07130  | 0.00000 | 0.46530 |
| 3              | 5 | 1 | (M2)-(O1): 2.205(3) | (0, 1, 0) | 0.07130  | 1.00000 | 0.46530 |
| 3              | 5 | 2 | (M2)-(O1): 2.205(3) | (0, 0, 1) | -0.07130 | 0.00000 | 0.53470 |
| 3              | 5 | 2 | (M2)-(O1): 2.205(3) | (0, 1, 1) | -0.07130 | 1.00000 | 0.53470 |
| 3              | 7 | 1 | (M2)-(OH): 2.047(6) | (0, 0, 0) | 0.03000  | 0.50000 | 0.82010 |
| 3              | 7 | 2 | (M2)-(OH): 2.047(6) | (0, 0, 1) | -0.03000 | 0.50000 | 0.17990 |
| <b>average</b> |   |   | <b>2.1523</b>       |           |          |         |         |

**Sample 3:** x = 0.75

|                |   |   |                     |             |          |          |          |
|----------------|---|---|---------------------|-------------|----------|----------|----------|
| 1              | 6 | 1 | (M1)-(O2): 2.149(4) | (0, 0, 0)   | 0.10360  | 0.00000  | 0.13080  |
| 1              | 6 | 2 | (M1)-(O2): 2.149(4) | (0, 0, 0)   | -0.10360 | 0.00000  | -0.13080 |
| 1              | 7 | 1 | (M1)-(OH): 2.141(3) | (0, -1, -1) | 0.02990  | -0.50000 | -0.18320 |
| 1              | 7 | 1 | (M1)-(OH): 2.141(3) | (0, 0, -1)  | 0.02990  | 0.50000  | -0.18320 |
| 1              | 7 | 2 | (M1)-(OH): 2.141(3) | (0, -1, 1)  | -0.02990 | -0.50000 | 0.18320  |
| 1              | 7 | 2 | (M1)-(OH): 2.141(3) | (0, 0, 1)   | -0.02990 | 0.50000  | 0.18320  |
| <b>average</b> |   |   | <b>2.1437</b>       |             |          |          |          |

|                |   |   |                     |           |          |         |         |
|----------------|---|---|---------------------|-----------|----------|---------|---------|
| 3              | 5 | 1 | (M2)-(O1): 2.198(3) | (0, 0, 0) | 0.07045  | 0.00000 | 0.46700 |
| 3              | 5 | 1 | (M2)-(O1): 2.198(3) | (0, 1, 0) | 0.07045  | 1.00000 | 0.46700 |
| 3              | 5 | 2 | (M2)-(O1): 2.198(3) | (0, 0, 1) | -0.07045 | 0.00000 | 0.53300 |
| 3              | 5 | 2 | (M2)-(O1): 2.198(3) | (0, 1, 1) | -0.07045 | 1.00000 | 0.53300 |
| 3              | 7 | 1 | (M2)-(OH): 2.030(4) | (0, 0, 0) | 0.02990  | 0.50000 | 0.81680 |
| 3              | 7 | 2 | (M2)-(OH): 2.030(4) | (0, 0, 1) | -0.02990 | 0.50000 | 0.18320 |
| <b>average</b> |   |   | <b>2.1420</b>       |           |          |         |         |

**Sample 4:**  $x = 0.88$

|                |   |   |                     |             |          |          |          |
|----------------|---|---|---------------------|-------------|----------|----------|----------|
| 1              | 6 | 1 | (M1)-(O2): 2.158(4) | (0, 0, 0)   | 0.10380  | 0.00000  | 0.13270  |
| 1              | 6 | 2 | (M1)-(O2): 2.158(4) | (0, 0, 0)   | -0.10380 | 0.00000  | -0.13270 |
| 1              | 7 | 1 | (M1)-(OH): 2.144(3) | (0, -1, -1) | 0.03160  | -0.50000 | -0.17950 |
| 1              | 7 | 1 | (M1)-(OH): 2.144(3) | (0, 0, -1)  | 0.03160  | 0.50000  | -0.17950 |
| 1              | 7 | 2 | (M1)-(OH): 2.144(3) | (0, -1, 1)  | -0.03160 | -0.50000 | 0.17950  |
| 1              | 7 | 2 | (M1)-(OH): 2.144(3) | (0, 0, 1)   | -0.03160 | 0.50000  | 0.17950  |
| <b>average</b> |   |   | <b>2.1487</b>       |             |          |          |          |
| 3              | 5 | 1 | (M2)-(O1): 2.212(3) | (0, 0, 0)   | 0.07119  | 0.00000  | 0.46730  |
| 3              | 5 | 1 | (M2)-(O1): 2.212(3) | (0, 1, 0)   | 0.07119  | 1.00000  | 0.46730  |
| 3              | 5 | 2 | (M2)-(O1): 2.212(3) | (0, 0, 1)   | -0.07119 | 0.00000  | 0.53270  |
| 3              | 5 | 2 | (M2)-(O1): 2.212(3) | (0, 1, 1)   | -0.07119 | 1.00000  | 0.53270  |
| 3              | 7 | 1 | (M2)-(OH): 2.064(4) | (0, 0, 0)   | 0.03160  | 0.50000  | 0.82050  |
| 3              | 7 | 2 | (M2)-(OH): 2.064(4) | (0, 0, 1)   | -0.03160 | 0.50000  | 0.17950  |
| <b>average</b> |   |   | <b>2.1627</b>       |             |          |          |          |
